# Supplementary material for: Pre-existing polymerase-specific T cells expand in abortive seronegative SARS-CoV-2 infection
Source: bioRxiv or medRxiv preprint supplement (doi:10.1101/2021.06.26.21259239), 2021-07-01
Supplement: Supplementary file [file media-1.pdf]

**Supplementary Table 1: HCoV sequence accession numbers**

| Accession | Viral species          |
|-----------|------------------------|
| MN369046  | Human coronavirus 229E |
| MN306046  | Human coronavirus 229E |
| MN306036  | Human coronavirus OC43 |
| MN306018  | Human coronavirus NL63 |
| MN310478  | Human coronavirus OC43 |
| MN310476  | Human coronavirus OC43 |
| MN306043  | Human coronavirus OC43 |
| MN306053  | Human coronavirus OC43 |
| MN306040  | Human coronavirus NL63 |
| MN306041  | Human coronavirus OC43 |
| MN306042  | Human coronavirus OC43 |
| MK334043  | Human coronavirus NL63 |
| MK334044  | Human coronavirus NL63 |
| MK334045  | Human coronavirus NL63 |
| MK334046  | Human coronavirus NL63 |
| MK334047  | Human coronavirus NL63 |
| MN026164  | Human coronavirus OC43 |
| MK167038  | Human coronavirus HKU1 |
| MH121121  | Human coronavirus OC43 |
| MH940245  | Human coronavirus HKU1 |
| MG197722  | Human coronavirus OC43 |
| MG197710  | Human coronavirus OC43 |
| MG197711  | Human coronavirus OC43 |
| MG197712  | Human coronavirus OC43 |
| MG197713  | Human coronavirus OC43 |
| MG197714  | Human coronavirus OC43 |
| MG197715  | Human coronavirus OC43 |
| MG197716  | Human coronavirus OC43 |
| MG197717  | Human coronavirus OC43 |
| MG197718  | Human coronavirus OC43 |
| MG197719  | Human coronavirus OC43 |
| MG197720  | Human coronavirus OC43 |
| MG197721  | Human coronavirus OC43 |
| MG197723  | Human coronavirus OC43 |
| MG197709  | Human coronavirus OC43 |
| MG977445  | Human coronavirus OC43 |
| MG977452  | Human coronavirus OC43 |
| MG977451  | Human coronavirus OC43 |
| MG977444  | Human coronavirus OC43 |
| MG977447  | Human coronavirus OC43 |
| MG977449  | Human coronavirus OC43 |
| MG428702  | Human coronavirus NL63 |
| MG428703  | Human coronavirus NL63 |
| MG428706  | Human coronavirus NL63 |
| MG428701  | Human coronavirus NL63 |
| MG428705  | Human coronavirus NL63 |
| MG428699  | Human coronavirus NL63 |
| MG428704  | Human coronavirus NL63 |
| MF314143  | Human coronavirus OC43 |
| MG772808  | Human coronavirus NL63 |
| KY014281  | Human coronavirus OC43 |
| KY014282  | Human coronavirus OC43 |
| MF374984  | Human coronavirus OC43 |
| MF374985  | Human coronavirus OC43 |
| MF374983  | Human coronavirus OC43 |
| MF542265  | Human coronavirus 229E |
| KY983587  | Human coronavirus 229E |
| KY983583  | Human coronavirus OC43 |
| KY983585  | Human coronavirus OC43 |
| KY983586  | Human coronavirus NL63 |
| KY983588  | Human coronavirus OC43 |
| KY967360  | Human coronavirus OC43 |
| KY621348  | Human coronavirus 229E |
| KY967359  | Human coronavirus OC43 |
| KY829118  | Human coronavirus NL63 |
| KY967357  | Human coronavirus 229E |
| KY967358  | Human coronavirus OC43 |
| KY967356  | Human coronavirus OC43 |

| Accession | Viral species          |
|-----------|------------------------|
| KY967361  | Human coronavirus OC43 |
| KY554967  | Human coronavirus NL63 |
| KY554968  | Human coronavirus NL63 |
| KY554972  | Human coronavirus OC43 |
| KY554973  | Human coronavirus OC43 |
| KY554974  | Human coronavirus OC43 |
| KY554971  | Human coronavirus NL63 |
| KY554970  | Human coronavirus NL63 |
| KY554975  | Human coronavirus OC43 |
| KY674914  | Human coronavirus 229E |
| KY674919  | Human coronavirus 229E |
| KY674916  | Human coronavirus NL63 |
| KY674920  | Human coronavirus OC43 |
| KY674943  | Human coronavirus HKU1 |
| KY674921  | Human coronavirus HKU1 |
| KY684760  | Human coronavirus 229E |
| KY684759  | Human coronavirus OC43 |
| KX538965  | Human coronavirus OC43 |
| KX538966  | Human coronavirus OC43 |
| KX538967  | Human coronavirus OC43 |
| KX538968  | Human coronavirus OC43 |
| KX538969  | Human coronavirus OC43 |
| KX538970  | Human coronavirus OC43 |
| KX538971  | Human coronavirus OC43 |
| KX538972  | Human coronavirus OC43 |
| KX538973  | Human coronavirus OC43 |
| KX538974  | Human coronavirus OC43 |
| KX538976  | Human coronavirus OC43 |
| KX538979  | Human coronavirus OC43 |
| KX538975  | Human coronavirus OC43 |
| KX538977  | Human coronavirus OC43 |
| KX538978  | Human coronavirus OC43 |
| KX538964  | Human coronavirus OC43 |
| KY369905  | Human coronavirus OC43 |
| KY369906  | Human coronavirus OC43 |
| KY369907  | Human coronavirus OC43 |
| KY369913  | Human coronavirus 229E |
| KY369914  | Human coronavirus 229E |
| KY369909  | Human coronavirus 229E |
| KY369908  | Human coronavirus 229E |
| KY369911  | Human coronavirus 229E |
| KY369912  | Human coronavirus 229E |
| KX179500  | Human coronavirus NL63 |
| KX344031  | Human coronavirus OC43 |
| KU291448  | Human coronavirus 229E |
| KU521535  | Human coronavirus NL63 |
| KT779556  | Human coronavirus HKU1 |
| KT779555  | Human coronavirus HKU1 |
| KU131570  | Human coronavirus OC43 |
| KT381875  | Human coronavirus NL63 |
| KF923908  | Human coronavirus OC43 |
| KF923909  | Human coronavirus OC43 |
| KF923910  | Human coronavirus OC43 |
| KF923915  | Human coronavirus OC43 |
| KF923916  | Human coronavirus OC43 |
| KF923919  | Human coronavirus OC43 |
| KF923922  | Human coronavirus OC43 |
| KF923923  | Human coronavirus OC43 |
| KF923924  | Human coronavirus OC43 |
| KF923925  | Human coronavirus OC43 |
| KF923912  | Human coronavirus OC43 |
| KF923913  | Human coronavirus OC43 |
| KF923914  | Human coronavirus OC43 |
| KF923918  | Human coronavirus OC43 |
| KF923920  | Human coronavirus OC43 |
| KF923917  | Human coronavirus OC43 |
| KF923894  | Human coronavirus OC43 |
| KF923897  | Human coronavirus OC43 |
| KF923921  | Human coronavirus OC43 |
| KF923887  | Human coronavirus OC43 |
| KF923889  | Human coronavirus OC43 |

| Accession | Viral species          |
|-----------|------------------------|
| KF923890  | Human coronavirus OC43 |
| KF923893  | Human coronavirus OC43 |
| KF923892  | Human coronavirus OC43 |
| KF923911  | Human coronavirus OC43 |
| KF923901  | Human coronavirus OC43 |
| KF923899  | Human coronavirus OC43 |
| KF923902  | Human coronavirus OC43 |
| KF923903  | Human coronavirus OC43 |
| KF923898  | Human coronavirus OC43 |
| KF923905  | Human coronavirus OC43 |
| KF923886  | Human coronavirus OC43 |
| KF923904  | Human coronavirus OC43 |
| KF923907  | Human coronavirus OC43 |
| KF923895  | Human coronavirus OC43 |
| KT266906  | Human coronavirus NL63 |
| KF530110  | Human coronavirus NL63 |
| KF530104  | Human coronavirus NL63 |
| KF530105  | Human coronavirus NL63 |
| KF530107  | Human coronavirus NL63 |
| KF530108  | Human coronavirus NL63 |
| KF530114  | Human coronavirus NL63 |
| KF530106  | Human coronavirus NL63 |
| KF530113  | Human coronavirus NL63 |
| KF530109  | Human coronavirus NL63 |
| KF530111  | Human coronavirus NL63 |
| KF530112  | Human coronavirus NL63 |
| KF686340  | Human coronavirus HKU1 |
| KF686342  | Human coronavirus HKU1 |
| KF686343  | Human coronavirus HKU1 |
| KF686344  | Human coronavirus HKU1 |
| KF686341  | Human coronavirus HKU1 |
| KF686346  | Human coronavirus HKU1 |
| KF514430  | Human coronavirus 229E |
| KF514433  | Human coronavirus 229E |
| KF514432  | Human coronavirus 229E |
| KF430201  | Human coronavirus HKU1 |
| JX504050  | Human coronavirus NL63 |
| JX503061  | Human coronavirus 229E |
| JX503060  | Human coronavirus 229E |
| JX524171  | Human coronavirus NL63 |
| JX104161  | Human coronavirus NL63 |
| JQ765571  | Human coronavirus NL63 |
| JQ765564  | Human coronavirus NL63 |
| JQ765572  | Human coronavirus NL63 |
| JQ765568  | Human coronavirus NL63 |
| JQ765570  | Human coronavirus NL63 |
| JQ765574  | Human coronavirus NL63 |
| JQ765565  | Human coronavirus NL63 |
| JQ765567  | Human coronavirus NL63 |
| JQ765573  | Human coronavirus NL63 |
| JQ765563  | Human coronavirus NL63 |
| JQ765575  | Human coronavirus NL63 |
| JQ765566  | Human coronavirus NL63 |
| JQ765569  | Human coronavirus NL63 |
| HM034837  | Human coronavirus HKU1 |
| DQ445911  | Human coronavirus NL63 |
| DQ445912  | Human coronavirus NL63 |
| DQ415896  | Human coronavirus HKU1 |
| DQ415897  | Human coronavirus HKU1 |
| DQ415898  | Human coronavirus HKU1 |
| DQ415899  | Human coronavirus HKU1 |
| DQ415900  | Human coronavirus HKU1 |
| DQ415901  | Human coronavirus HKU1 |
| DQ415902  | Human coronavirus HKU1 |
| DQ415903  | Human coronavirus HKU1 |
| DQ415904  | Human coronavirus HKU1 |
| DQ415905  | Human coronavirus HKU1 |
| DQ415906  | Human coronavirus HKU1 |
| DQ415907  | Human coronavirus HKU1 |
| DQ415908  | Human coronavirus HKU1 |
| DQ415909  | Human coronavirus HKU1 |
| DQ415910  | Human coronavirus HKU1 |
| DQ415911  | Human coronavirus HKU1 |
| DQ415912  | Human coronavirus HKU1 |
| DQ415913  | Human coronavirus HKU1 |
| DQ415914  | Human coronavirus HKU1 |
| AY597011  | Human coronavirus HKU1 |
