# Supplementary material for: Pre-existing polymerase-specific T cells expand in abortive seronegative SARS-CoV-2 infection
Source: bioRxiv or medRxiv preprint supplement (doi:10.1101/2021.06.26.21259239), 2021-07-01
Supplement: Supplementary file [file media-2.pdf]

**Supplementary Table 2: 2D epitope mapping matrices.**

| <b>NSP7</b> | <b>Pool A</b> | <b>Pool B</b> | <b>Pool C</b> | <b>Pool D</b> |
|-------------|---------------|---------------|---------------|---------------|
| Pool E      | 7-1           | 7-2           | 7-3           | 7-4           |
| Pool F      | 7-5           | 7-6           | 7-7           | 7-8           |
| Pool G      | 7-9           | 7-10          | 7-11          | 7-12          |
| Pool H      | 7-13          | 7-14          | 7-15          | x             |

| <b>NSP12-2</b> | <b>Pool A</b> | <b>Pool B</b> | <b>Pool C</b> | <b>Pool D</b> | <b>Pool E</b> | <b>Pool F</b> |       |
|----------------|---------------|---------------|---------------|---------------|---------------|---------------|-------|
| Pool G         | 12-38         | 12-39         | 12-40         | 12-41         | 12-42         | 12-43         | x     |
| Pool H         | 12-44         | 12-45         | 12-46         | 12-47         | 12-48         | 12-49         | x     |
| Pool I         | 12-50         | 12-51         | 12-52         | 12-53         | 12-54         | 12-55         | x     |
| Pool J         | 12-56         | 12-57         | 12-58         | 12-59         | 12-60         | 12-61         | x     |
| Pool K         | 12-62         | 12-63         | 12-64         | 12-65         | 12-66         | 12-67         | x     |
| Pool L         | 12-68         | 12-69         | 12-70         | 12-71         | 12-72         | 12-73         | 12-74 |

| <b>NSP12-3</b> | <b>Pool A</b> | <b>Pool B</b> | <b>Pool C</b> | <b>Pool D</b> | <b>Pool E</b> | <b>Pool F</b> |        |
|----------------|---------------|---------------|---------------|---------------|---------------|---------------|--------|
| Pool G         | 12-75         | 12-76         | 12-77         | 12-78         | 12-79         | 12-80         | x      |
| Pool H         | 12-81         | 12-82         | 12-83         | 12-84         | 12-85         | 12-86         | x      |
| Pool I         | 12-87         | 12-88         | 12-89         | 12-90         | 12-91         | 12-92         | x      |
| Pool J         | 12-93         | 12-94         | 12-95         | 12-96         | 12-97         | 12-98         | x      |
| Pool K         | 12-99         | 12-100        | 12-101        | 12-102        | 12-103        | 12-104        | x      |
| Pool L         | 12-105        | 12-106        | 12-107        | 12-108        | 12-109        | 12-110        | 12-111 |

| <b>NSP12-5</b> | <b>Pool A</b> | <b>Pool B</b> | <b>Pool C</b> | <b>Pool D</b> | <b>Pool E</b> | <b>Pool F</b> |        |
|----------------|---------------|---------------|---------------|---------------|---------------|---------------|--------|
| Pool G         | 12-149        | 12-150        | 12-151        | 12-152        | 12-153        | 12-154        | x      |
| Pool H         | 12-155        | 12-156        | 12-157        | 12-158        | 12-159        | 12-160        | x      |
| Pool I         | 12-161        | 12-162        | 12-163        | 12-164        | 12-165        | 12-166        | x      |
| Pool J         | 12-167        | 12-168        | 12-169        | 12-170        | 12-171        | 12-172        | x      |
| Pool K         | 12-173        | 12-174        | 12-175        | 12-176        | 12-177        | 12-178        | x      |
| Pool L         | 12-179        | 12-180        | 12-181        | 12-182        | 12-183        | 12-184        | 12-185 |

| <b>NSP13-3</b> | <b>Pool A</b> | <b>Pool B</b> | <b>Pool C</b> | <b>Pool D</b> | <b>Pool E</b> | <b>Pool F</b> | <b>PoolG</b> |
|----------------|---------------|---------------|---------------|---------------|---------------|---------------|--------------|
| Pool H         | 13-79         | 13-80         | 13-81         | 13-82         | 13-83         | 13-84         | 13-85        |
| Pool I         | 13-86         | 13-87         | 13-88         | 13-89         | 13-90         | 13-91         | 13-92        |
| Pool J         | 13-93         | 13-94         | 13-95         | 13-96         | 13-97         | 13-98         | 13-99        |
| Pool K         | 13-100        | 13-101        | 13-102        | 13-103        | 13-104        | 13-105        | 13-106       |
| Pool L         | 13-107        | 13-108        | 13-109        | 13-110        | 13-111        | 13-112        | 13-113       |
| Pool M         | 13-114        | 13-115        | 13-116        | 13-117        | 13-118        | x             | x            |
