# Supplementary material for: Pre-existing polymerase-specific T cells expand in abortive seronegative SARS-CoV-2 infection
Source: bioRxiv or medRxiv preprint supplement (doi:10.1101/2021.06.26.21259239), 2021-07-01
Supplement: Supplementary file [file media-3.pdf]

Supplementary Table 3: NSP12 Overlapping peptide sequences.

SARS-CoV Peptides NSP 12

| # peptide | NSP12            | aa      |
|-----------|------------------|---------|
| 12-1      | SADASTFLNRVCGVS  | 1-15    |
| 12-2      | TLNLRVCGVSAARLT  | 6-20    |
| 12-3      | VCGVSAARLTPCGTG  | 11-25   |
| 12-4      | AARLTPCGTGTSTDV  | 16-30   |
| 12-5      | PCGTGTSTDVVYRAF  | 21-35   |
| 12-6      | TSTDVVYRAFDIYNE  | 26-40   |
| 12-7      | VYRAFDIYNEKVAGF  | 31-45   |
| 12-8      | DIYNEKVAGFAKFLK  | 36-50   |
| 12-9      | KVAGFAKFLKTNCCR  | 41-55   |
| 12-10     | AKFLKTNCCRFQEKD  | 46-60   |
| 12-11     | TNCCRFQEKDEEGNL  | 51-65   |
| 12-12     | FQEKDEEGNLLDSYF  | 56-70   |
| 12-13     | EEGNLLDSYFVVKRH  | 61-75   |
| 12-14     | LDSYFVVKRHTMSNY  | 66-80   |
| 12-15     | VVKRHTMSNYQHEET  | 71-85   |
| 12-16     | TMSNYQHEETIYNLV  | 76-90   |
| 12-17     | QHEETIYNLVKDCPA  | 81-95   |
| 12-18     | IYNLVKDCPAVAVHD  | 86-100  |
| 12-19     | KDCPAVAVHDFKFR   | 91-105  |
| 12-20     | VAVHDFKFRVDGDM   | 96-110  |
| 12-21     | FFKFRVDGDMVPHIS  | 101-115 |
| 12-22     | VDGDMVPHISRQRLT  | 106-120 |
| 12-23     | VPHISRQRLTKYTMA  | 111-125 |
| 12-24     | RQRLTKYTMAADLVYA | 116-130 |
| 12-25     | KYTMAADLVYALRHF  | 121-135 |
| 12-26     | DLVYALRHFDEGNCD  | 126-140 |
| 12-27     | LRHFDEGNCDTLKEI  | 131-145 |
| 12-28     | EGNCDTLKEILVTYN  | 136-150 |
| 12-29     | TLKEILVTYNCCDDD  | 141-155 |
| 12-30     | LVTYNCCDDDFNKK   | 146-160 |
| 12-31     | CCDDDFNKKDWYDF   | 151-165 |
| 12-32     | YFNKKDWYDFVENPD  | 156-170 |
| 12-33     | DWYDFVENPDILRVY  | 161-175 |
| 12-34     | VENPDILRVYANLGE  | 166-180 |
| 12-35     | ILRVYANLGERVRQS  | 171-185 |
| 12-36     | ANLGERVRQSLKTV   | 176-190 |
| 12-37     | RVRQSLKTVQFCDA   | 181-195 |
| 12-38     | LLKTVQFCDAMRDAG  | 186-200 |
| 12-39     | QFCDAMRDAGIVGVL  | 191-205 |
| 12-40     | MRDAGIVGLTLDNQ   | 196-210 |
| 12-41     | IVGLTLDNQDLNGN   | 201-215 |
| 12-42     | TLDNQDLNGNWYDFG  | 206-220 |
| 12-43     | DLNGNWYDFGDFVQV  | 211-225 |
| 12-44     | WYDFGDFVQVAPGCG  | 216-230 |
| 12-45     | DFVQVAPGCGVPIVD  | 221-235 |
| 12-46     | APGCGVPIVDSYSSL  | 226-240 |
| 12-47     | VPIVDSYSSLMPIL   | 231-245 |
| 12-48     | SYSSLMPILTLTRA   | 236-250 |
| 12-49     | LMPILTLTRALAAES  | 241-255 |
| 12-50     | TLTRALAAESHMDAD  | 246-260 |
| 12-51     | LAESHMDADLAKPL   | 251-265 |
| 12-52     | HMDADLAKPLIKWDL  | 256-270 |
| 12-53     | LAKPLIKWDLKYDF   | 261-275 |
| 12-54     | IKWDLKYDFTEERL   | 266-280 |
| 12-55     | LKYDFTEERLCLFDR  | 271-285 |
| 12-56     | TEERLCLFDRYFKYW  | 276-290 |
| 12-57     | CLFDRYFKYWDQTYH  | 281-295 |
| 12-58     | YFKYWDQTYHPNCIN  | 286-300 |
| 12-59     | DQTYHPNCINCLDDR  | 291-305 |
| 12-60     | PNCINCLDDRILHLC  | 296-310 |
| 12-61     | CLDDRILHLCANFNV  | 301-315 |
| 12-62     | CILHLCANFNVLFSTV | 306-320 |
| 12-63     | ANFNVLFSTVPPTS   | 311-325 |
| 12-64     | LFSTVPPTSFGPLV   | 316-330 |
| 12-65     | FPPTSFGPLVRKIFV  | 321-335 |
| 12-66     | FGPLVRKIFVDGVVPF | 326-340 |
| 12-67     | RKIFVDGVVPFVSTG  | 331-345 |
| 12-68     | DGVVPFVSTGYHFRE  | 336-350 |
| 12-69     | VVSTGYHFRELGVVH  | 341-355 |
| 12-70     | YHFRELGVVHNQDVN  | 346-360 |
| 12-71     | LGVVHNQDVNLHSSR  | 351-365 |
| 12-72     | NQDVNLHSSRSLFKE  | 356-370 |
| 12-73     | LHSSRSLFKELLVYA  | 361-375 |
| 12-74     | LSFKELLVYAADPAM  | 366-380 |
| 12-75     | LLVYAADPAMHAASG  | 371-385 |
| 12-76     | ADPAMHAASGNLLLD  | 376-390 |
| 12-77     | HAASGNLLLDKRTTC  | 381-395 |
| 12-78     | NLLLDKRTTCFSVAA  | 386-400 |
| 12-79     | KRTTCFSVAALTNNV  | 391-405 |
| 12-80     | FSVAALTNNVAFQTV  | 396-410 |
| 12-81     | LTNNVAFQTVKPGNF  | 401-415 |
| 12-82     | AFQTVKPGNFNKDFY  | 406-420 |
| 12-83     | KPGNFNKDFYDFAVS  | 411-425 |
| 12-84     | NKDFYDFAVSKGFFK  | 416-430 |
| 12-85     | DFAVSKGFFKEGSSV  | 421-435 |
| 12-86     | KGFFKEGSSVELKH   | 426-440 |
| 12-87     | EGSSVELKHFFFAQD  | 431-445 |
| 12-88     | ELKHFFFAQDGNAAI  | 436-450 |
| 12-89     | FFAQDGNAAISDYDY  | 441-455 |
| 12-90     | GNAAISDYDYRYNL   | 446-460 |
| 12-91     | SDYDYRYNLPTMCD   | 451-465 |
| 12-92     | YRYNLPTMCDIRQLL  | 456-470 |

SARS-CoV-2 Peptides NSP 12

Divergence in sequence from SARS-CoV to SARS-CoV-2 are highlighted in bold

| # peptide | SARS-CoV-2 NSP12 | aa      |
|-----------|------------------|---------|
| 12-38     | LLKTVQFCDAMRNAG  | 186-200 |
| 12-39     | QFCDAMRNAGIVGVL  | 191-205 |
| 12-40     | MRNAGIVGLTLDNQ   | 196-210 |
| 12-43     | DLNGNWYDFGDFIQT  | 211-225 |
| 12-44     | WYDFGDFIQTPGSG   | 216-230 |
| 12-45     | DFIQTPGSGVPPVD   | 221-235 |
| 12-46     | TPGSGVPPVDSYSSL  | 226-240 |
| 12-47     | VPVDSYSSLMPIL    | 231-245 |
| 12-49     | LMPILTLTRALAAES  | 241-255 |
| 12-50     | TLTRALAAESHVDT   | 246-260 |
| 12-51     | LTAESHVDTLTKPY   | 251-265 |
| 12-52     | HVDTLTKPYIKWDL   | 256-270 |
| 12-53     | LTKPYIKWDLKYDF   | 261-275 |
| 12-55     | LKYDFTEERLKLFD   | 271-285 |
| 12-56     | TEERLKLFDYFKYW   | 276-290 |
| 12-57     | KLFDYFKYWDQTYH   | 281-295 |
| 12-58     | YFKYWDQTYHPNCVN  | 286-300 |
| 12-59     | DQTYHPNCVNCLDDR  | 291-305 |
| 12-60     | PNCVNCLDDRILHLC  | 296-310 |

NSP12-2

|        |                   |         |
|--------|-------------------|---------|
| 12-93  | PTMCDIRQLLFVVEV   | 461-475 |
| 12-94  | IRQLLFVVEVVDKYF   | 466-480 |
| 12-95  | FVVEVVDKYFDCYDG   | 471-485 |
| 12-96  | VDKYFDCYDGGCINA   | 476-490 |
| 12-97  | DCYDGGCINANQVIV   | 481-495 |
| 12-98  | GCINANQVIVNNLDK   | 486-500 |
| 12-99  | NQVIVNNLDKSAGFP   | 491-505 |
| 12-100 | NNLDKSAGFPFNKVG   | 496-510 |
| 12-101 | SAGFPFNKVGKARLY   | 501-515 |
| 12-102 | FNKVGKARLYYDSMS   | 506-520 |
| 12-103 | KARLYYDSMSYEDQD   | 511-525 |
| 12-104 | YDSMSYEDQDALFAY   | 516-530 |
| 12-105 | YEDQDALFAYTKRNV   | 521-535 |
| 12-106 | ALFAYTKRNVIPTIT   | 526-540 |
| 12-107 | TKRNVIPTITQMNLK   | 531-545 |
| 12-108 | IPTITQMNLYAISA    | 536-550 |
| 12-109 | QMNLYAISAKNRAR    | 541-555 |
| 12-110 | YAISAKNRARTVAGV   | 546-560 |
| 12-111 | KNRARTVAGVSICST   | 551-565 |
| 12-112 | TVAGVSICSTMTRRQ   | 556-570 |
| 12-113 | SICSTMTRRQFHQKL   | 561-575 |
| 12-114 | MTNRQFHQKLLKSLA   | 566-580 |
| 12-115 | FHQKLLKSIAATRGA   | 571-585 |
| 12-116 | LKSIAATRGA TVVIG  | 576-590 |
| 12-117 | ATRGATVVIGTSKPY   | 581-595 |
| 12-118 | TVVIGTSKPYGGWHN   | 586-600 |
| 12-119 | TSKPYGGWHNMLKTV   | 591-605 |
| 12-120 | GGWHNMLKTVYSDVE   | 596-610 |
| 12-121 | MLKTVYSDVETPHLM   | 601-615 |
| 12-122 | YSDVETPHLMGWDYP   | 606-620 |
| 12-123 | TPHLMGWDYPKCDRA   | 611-625 |
| 12-124 | GWDYPKCDRAMPNML   | 616-630 |
| 12-125 | KCDRAMPNMLRIMAS   | 621-635 |
| 12-126 | MPNMLRIMASLVLAR   | 626-640 |
| 12-127 | RIMASLVLARKHNTC   | 631-645 |
| 12-128 | LVLARKHNTCCNLSH   | 636-650 |
| 12-129 | KHNTCCNLSHRFYRL   | 641-655 |
| 12-130 | CNLSHRFYRLANECA   | 646-660 |
| 12-131 | RFYRLANECAQVLSE   | 651-665 |
| 12-132 | ANECAQVLSEVMVCG   | 656-670 |
| 12-133 | QVLSEVMVCGSGLYV   | 661-675 |
| 12-134 | MVMCGSGLYVPGGT    | 666-680 |
| 12-135 | GSLYVPGGTSSGDA    | 671-685 |
| 12-136 | KPGGTSSGDATTAYA   | 676-690 |
| 12-137 | SSGDATTAYANSVFN   | 681-695 |
| 12-138 | TTAYANSVFNICQAV   | 686-700 |
| 12-139 | NSVFNICQAVTANVN   | 691-705 |
| 12-140 | ICQAVTANVNALLST   | 696-710 |
| 12-141 | TANVNALLSTDGNKI   | 701-715 |
| 12-142 | ALLSTDGNKIADKYV   | 706-720 |
| 12-143 | DGNKIADKYVRNLQH   | 711-725 |
| 12-144 | ADKYVRNLQHRLYEC   | 716-730 |
| 12-145 | RNLQHRLYECLYRNR   | 721-735 |
| 12-146 | RLYECLYRNRDVEDE   | 726-740 |
| 12-147 | LYRNRDVEDEHFVDEF  | 731-745 |
| 12-148 | DVEDEHFVDEFAYLR   | 736-750 |
| 12-149 | FVDEFAYLRKHFSM    | 741-755 |
| 12-150 | YAYLRKHFSMMILSD   | 746-760 |
| 12-151 | KHFSMMILSDDAVVC   | 751-765 |
| 12-152 | MILSDDAVVCYNSNY   | 756-770 |
| 12-153 | DAVVCYNSNYAAQGL   | 761-775 |
| 12-154 | YNSNYAAQGLVASIK   | 766-780 |
| 12-155 | AAQGLVASIKNFKAV   | 771-785 |
| 12-156 | VASIKNFKAVLYYQN   | 776-790 |
| 12-157 | NFKAVLYYQNNVFM    | 781-795 |
| 12-158 | LYYQNNVFMSEAKCW   | 786-800 |
| 12-159 | NVFMSEAKCWETDL    | 791-805 |
| 12-160 | EAKCWETDLTKGPH    | 796-810 |
| 12-161 | TETDLTKGPHFCSQ    | 801-815 |
| 12-162 | TKGPHFCSQHTMLV    | 806-820 |
| 12-163 | EFCSQHTMLVKQGDD   | 811-825 |
| 12-164 | HTMLVKQGDDYVYLP   | 816-830 |
| 12-165 | KQGDDYVYLPYDPS    | 821-835 |
| 12-166 | YVYLPYDPSRILGA    | 826-840 |
| 12-167 | YDPSRILGAGCFVD    | 831-845 |
| 12-168 | RILGAGCFVDIVKT    | 836-850 |
| 12-169 | GCFVDIVKT DGTLM   | 841-855 |
| 12-170 | DIVKT DGTLMIERFV  | 846-860 |
| 12-171 | DGTLMIERFVSLAID   | 851-865 |
| 12-172 | IERFVSLAIDAYPLT   | 856-870 |
| 12-173 | SLAIDAYPLTKHPNQ   | 861-875 |
| 12-174 | AYPLTKHPNQEYADV   | 866-880 |
| 12-175 | KHPNQEYADV FHLYL  | 871-885 |
| 12-176 | EYADV FHLYLQYIRK  | 876-890 |
| 12-177 | FHLYLQYIRKLHDEL   | 881-895 |
| 12-178 | QYIRKLHDEL TGHML  | 886-900 |
| 12-179 | LHDEL TGHMLDMYSV  | 891-905 |
| 12-180 | TGHMLDMYSV MLTND  | 896-910 |
| 12-181 | DMYSV MLTNDNTSR   | 901-915 |
| 12-182 | MLTNDNTSR YWEPF   | 906-920 |
| 12-183 | NTSR YWEPF YEAMY  | 911-925 |
| 12-184 | YEPF YEAMY TPHTV  | 916-930 |
| 12-185 | PEPF YEAMY PHTVLQ | 921-935 |

|         |        |                 |         |
|---------|--------|-----------------|---------|
| NSP12-5 | 12-149 | FVDEFAYLRKHFSM  | 741-755 |
|         | 12-152 | MILSDDAVVCFNSTY | 756-770 |
|         | 12-153 | DAVVCFNSTYASQGL | 761-775 |
|         | 12-154 | FNSTYASQGLVASIK | 766-780 |
|         | 12-155 | ASQGLVASIKNFKSV | 771-785 |
|         | 12-156 | VASIKNFKSVLYYQN | 776-790 |
|         | 12-157 | NFKSVLYYQNNVFM  | 781-795 |
